# Supplementary material
Source: PubMed Central journal article supplement (PMC3129929)

ECM

Fibronectin

Collagen I

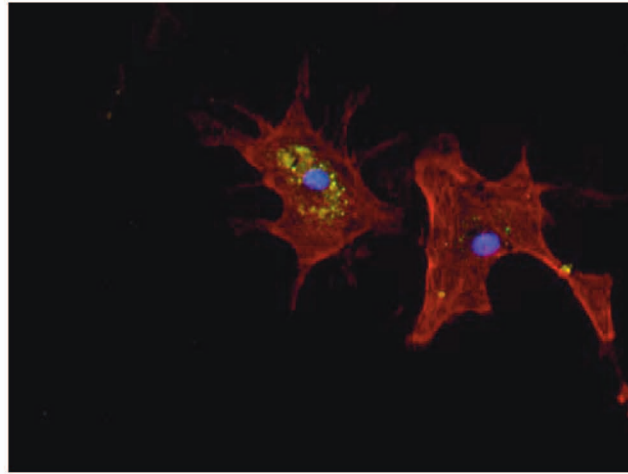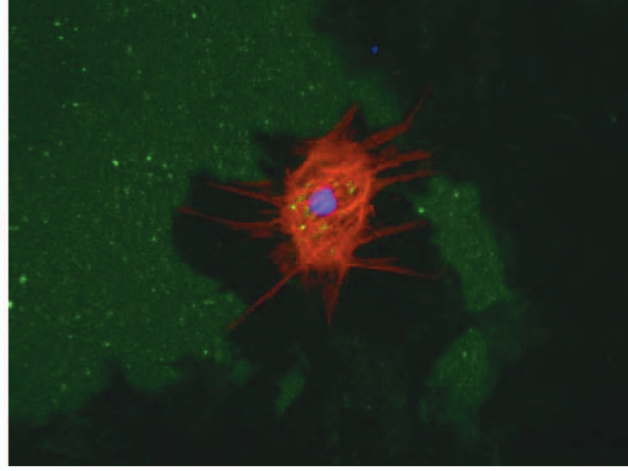

Antibody

Collagen I

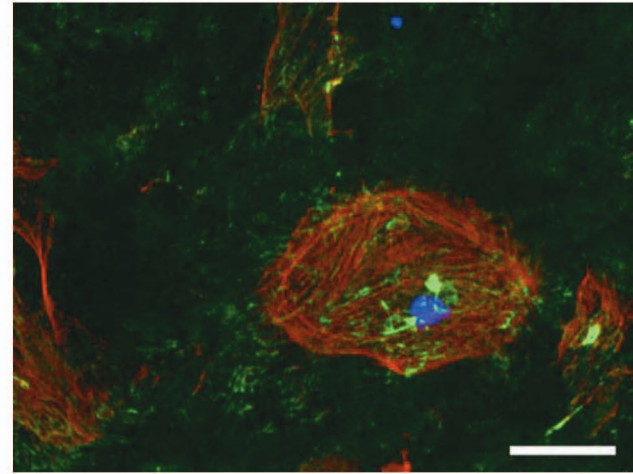

Fibronectin

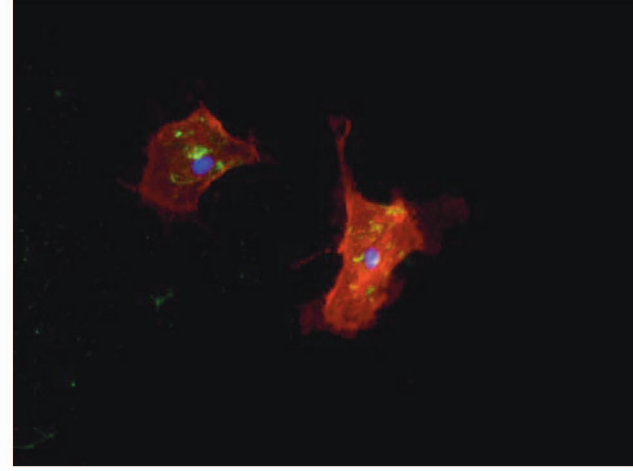

Supplement: supp_00412.2010_figS1.pdf [file supp_00412.2010_figS1.pdf]

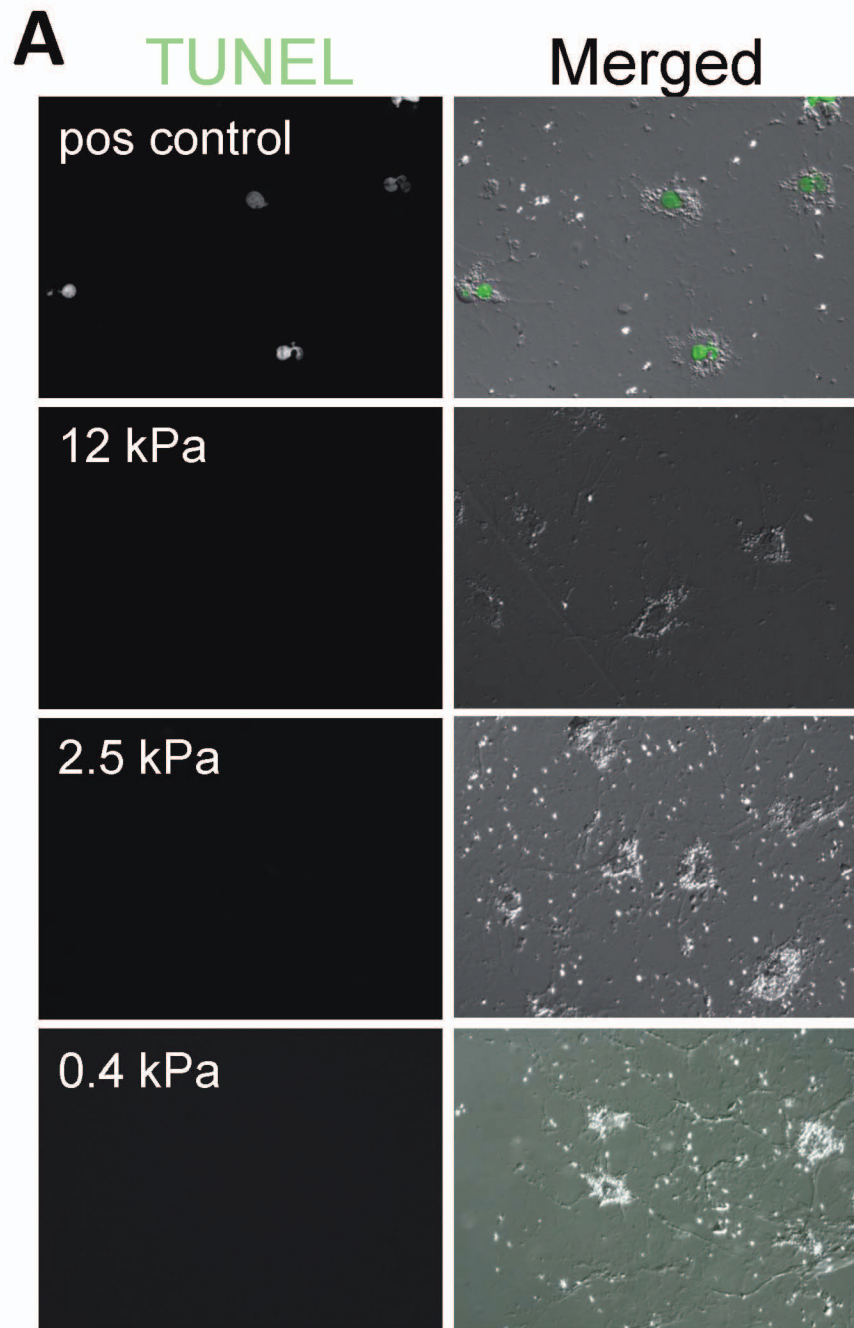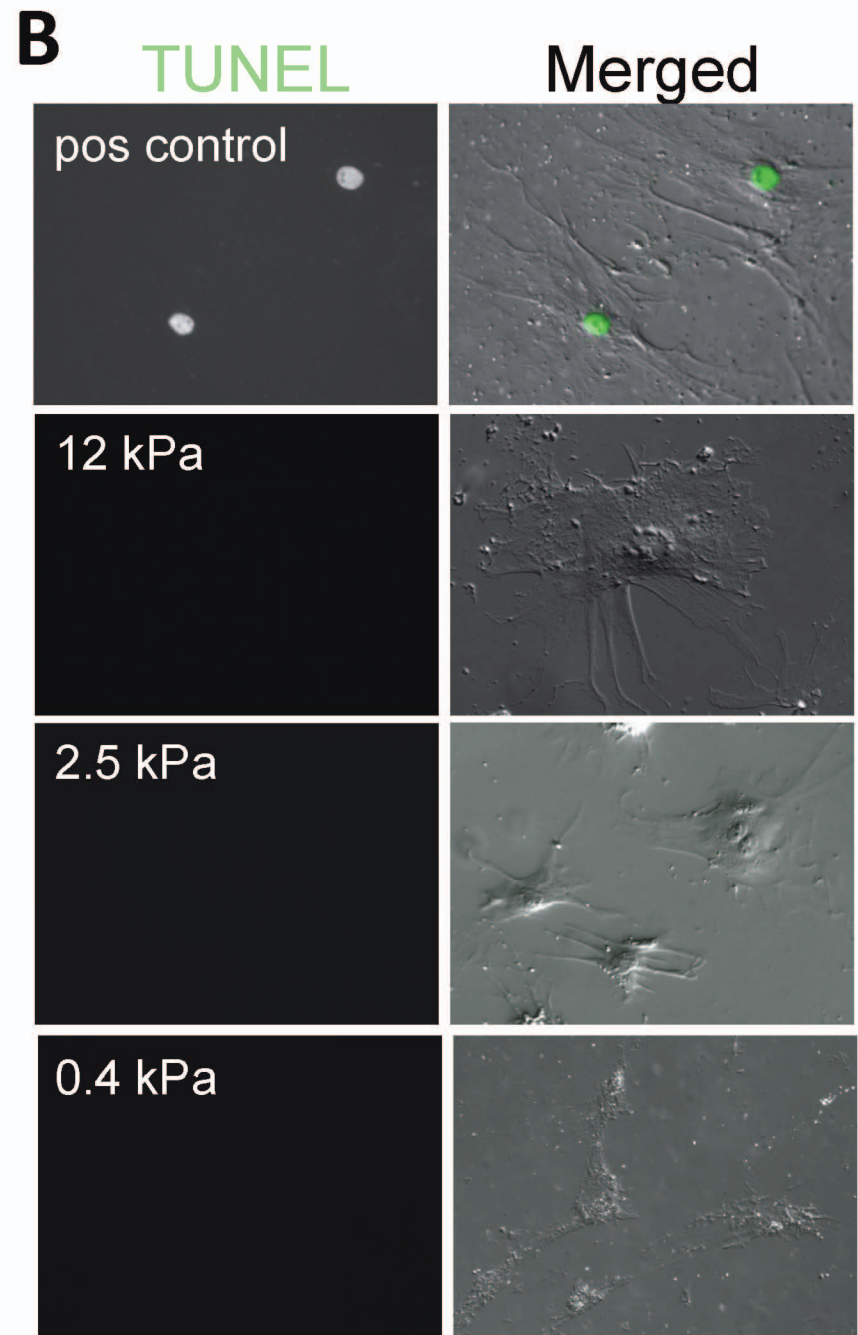

Supplement: supp_00412.2010_figS2.pdf [file supp_00412.2010_figS2.pdf]
